# Supplementary material for: Milk Lymphocyte Profile and Macrophage Functions: New Insights Into the Immunity of the Mammary Gland in Quarters Infected With Corynebacterium Bovis
Source: Research Square preprint supplement (doi:10.21203/rs.3.rs-473771/v1), 2021-05-10
Supplement: Supplementary file 1 [file f270475d110b319f940679f4.docx]

**Supplemental Material 2**

**Supplemental Table 2.** Percentage (mean ± standard error) of B and T lymphocytes in milk samples from healthy mammary quarters infected with *Corynebacterium bovis*

| **Lymphocyte population** | **Healthy (%)** | ***Corynebacterium bovis*** (%) |
| --- | --- | --- |
| **B lymphocytes (CD21+)** | 14.16 ± 1.45a | 14.89 ± 1.30a |
| **T lymphocytes (CD3+)** | 10.56 ± 1.06b | 14.87 ± 1.61a |
| **CD4+ CD8- T lymphocytes** | 1.60 ± 0.30b | 2.75 ± 0.48a |
| **CD4- CD8+ T lymphocytes** | 4.64 ± 0.57a | 6.31 ± 0.76a |
| **CD4- CD8- T lymphocytes** | 4.03 ± 0.67a | 5.51 ± 0.99a |

Different letters indicate *P* < 0.05.
