# Supplementary material for: Milk Lymphocyte Profile and Macrophage Functions: New Insights Into the Immunity of the Mammary Gland in Quarters Infected With Corynebacterium Bovis
Source: Research Square preprint supplement (doi:10.21203/rs.3.rs-473771/v1), 2021-05-10
Supplement: Supplementary file 3 [file 970d66b5fa6e10ff2d4e281b.docx]

**Supplemental Material 1**

| Description | Primary antibody | | | | | | | Secondary antibody | | | | | | |
| --- | --- | --- | --- | --- | --- | --- | --- | --- | --- | --- | --- | --- | --- | --- |
|  | Name | Type | Amount | Specificity | Host | Company | Isotype | Name | Type | Amount | Specificity | Host | Company | Isotype |
| T Lymphocyte | MM1A | CD3 | 1 µL | Bovine | Mouse | VMRD1 | IgG1 | M32018 | IgG1 – PE-Cy5 | 1 µL | Mouse | Goat | Invitrogen2 | IgG1 |
| CD4 T Lymphocyte | ILA11 | CD4 | 1 µL | Bovine | Mouse | VMRD1 | IgG2a | M32204 | IGG2a – PE | 1 µL | Mouse | Goat | Invitrogen2 | IgG2a |
| CD8 T Lymphocyte | BAQ111A | CD8 | 1 µL | Bovine | Mouse | VMRD1 | IgM | M31501 | IgM – FITC | 1 µL | Mouse | Goat | Invitrogen2 | IgM |
| B Lymphocyte | BAQ15A | CD21 | 1 µL | Bovine | Mouse | VMRD1 | IgM | M31505 | IgM – APC | 2 µL | Mouse | Goat | Invitrogen2 | IgM |

**Supplemental Table 1.** Monoclonal antibodies used for immunophenotyping bovine milk lymphocytes by flow cytometry

APC: Allophycocyanin; FITC: fluorescein isothiocyanate; PE: R-Phycoerythrin; PE-Cy5: Phycoerythrin cyanine 5; 1VMRD Pullman Inc. Corp®, Pullman, WA, USA; 2Invitrogen, Carlsbad, CA, USA.
